# Supplementary material
Source: ML conference proceedings conference paper supplement (https://aclanthology.org/2026.semeval-1.11)
Supplement: SupplementaryMaterial [file example-TaskA1-data_cropped.pdf › latex/figs/example-TaskA1-data_cropped.pdf]

```
Input: {  
  "ID": "R001",  
  "Text": "average to good thai food, but terrible  
delivery.",  
  "Aspect": ["thai food", "delivery"]  
}
```

```
Output: {  
  "ID": "R001",  
  "Aspect VA": [  
    {"Aspect": "thai food", "VA": "6.75#6.38"},  
    {"Aspect": "delivery", "VA": "2.88#6.62"}  
  ]  
}
```

Valence,  
Arousal
