# Supplementary material
Source: ML conference proceedings conference paper supplement (https://aclanthology.org/2026.semeval-1.11)
Supplement: SupplementaryMaterial [file example-TaskB1-data_cropped.pdf › latex/figs/example-TaskB1-data_cropped.pdf]

**Input:** {"ID": "stance26\_aspect\_va\_dev\_10",

"Text": "Say somehow we succeed and now have access to unlimited clean energy. What happens then ? Do we swap over to this new energy ? Do politicians in the pocket of oil and gas companies stop it from progressing ? Does having no energy limits lead to an even greater population problem around the world ? Could it lead to space exploration with rockets thats have unlimited fuel ? I'm far too dumb to understand the science but it is crazy to me that it is something I could potentially see in my lifetime.",

"Aspect": ["unlimited clean energy", "space exploration"] }

**Output:** {"ID": "stance26\_aspect\_va\_dev\_10",

"Aspect\_VA": [{"Aspect": "unlimited clean energy", "VA": "7.33#6.83"},

{"Aspect": "space exploration", "VA": "6.50#6.00"}] }
