# Supplementary material
Source: ML conference proceedings conference paper supplement (https://aclanthology.org/2026.semeval-1.11)
Supplement: SupplementaryMaterial [file QuadAI_SemEval_2026_T3_-6-listing_cropped.pdf › latex/figs/QuadAI_SemEval_2026_T3_-6-listing_cropped.pdf]

```
CLUSTER_CRITIQUE_PROMPT = (  
    """"You are an expert in sentiment analysis.  
Below is a cluster of aspect-sentiment examples grouped by  
    similar  
Valence-Arousal (VA) values.
```

DEFINITIONS:

- Valence: 1=very negative to 9=very positive
- Arousal: 1=very calm to 9=very intense

CLUSTER EXAMPLES:

```
{examples_text}
```

TASK: Identify which examples (if any) have  
 spurious/incorrect VA labels  
that don't match the text sentiment. An example is spurious  
 if:

1. The VA values don't match the sentiment expressed in the  
 text
2. The aspect sentiment is clearly different from the labeled  
 values
3. The label seems inconsistent with similar examples in this  
 cluster

Return ONLY valid JSON with NO extra text:

```
{{  
    "spurious_indices": [0, 5, 12],  
    "reasoning": "Example 0: Text is very negative but valence  
        is too high.  
    Example 5: ..."  
}}
```

If no examples are spurious, return:

```
{{"spurious_indices": [], "reasoning": "All labels appear  
    correct"}}"""  
)
```
