# Supplementary material
Source: ML conference proceedings conference paper supplement (https://aclanthology.org/2026.semeval-1.11)

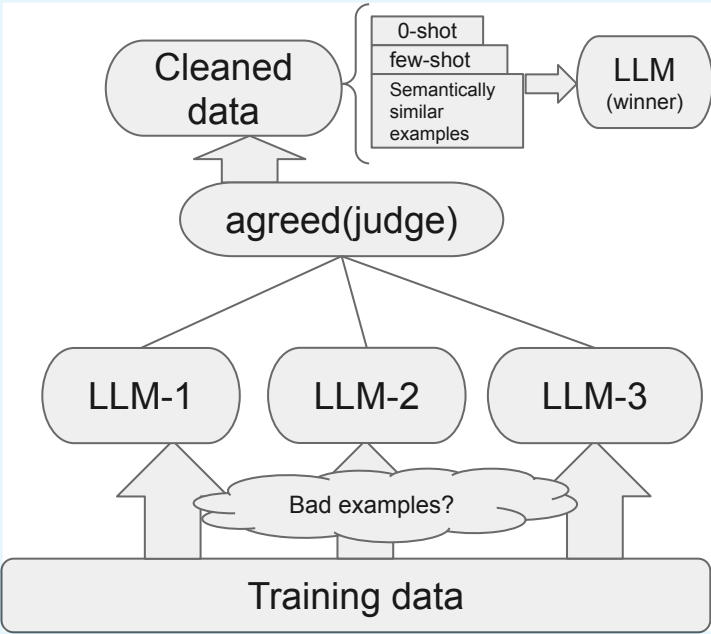

Supplement: SupplementaryMaterial [file 3LLMs-diagram-3_cropped.pdf › latex/figs/3LLMs-diagram-3_cropped.pdf]

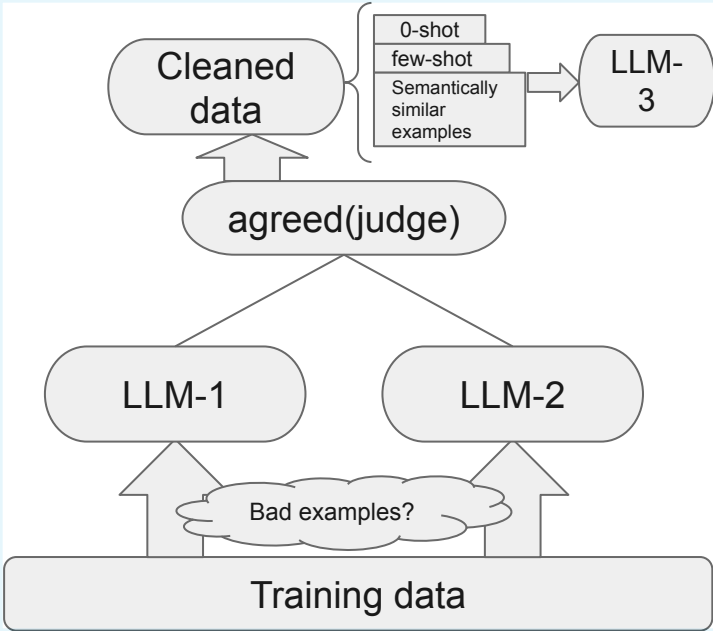

Supplement: SupplementaryMaterial [file 3LLMs-diagram_cropped.pdf › latex/figs/3LLMs-diagram_cropped.pdf]

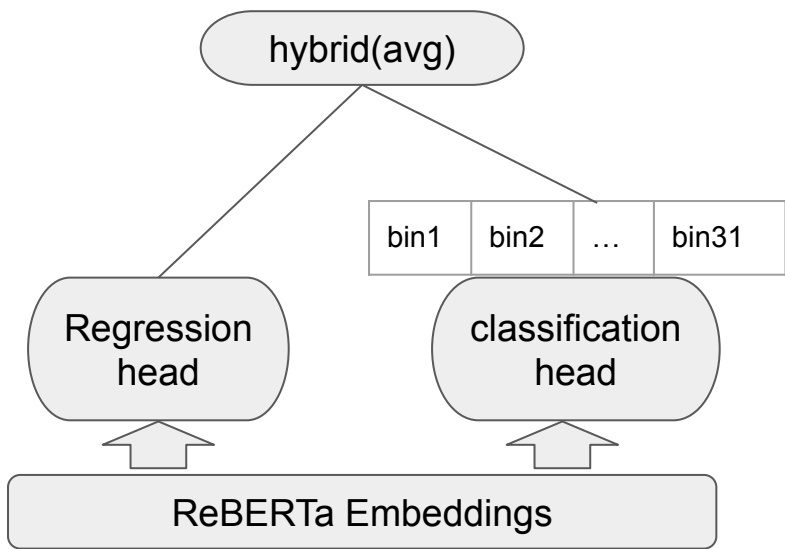

Supplement: SupplementaryMaterial [file Hybrid_Roberta-2-3.pdf › latex/figs/Hybrid_Roberta-2-3.pdf]

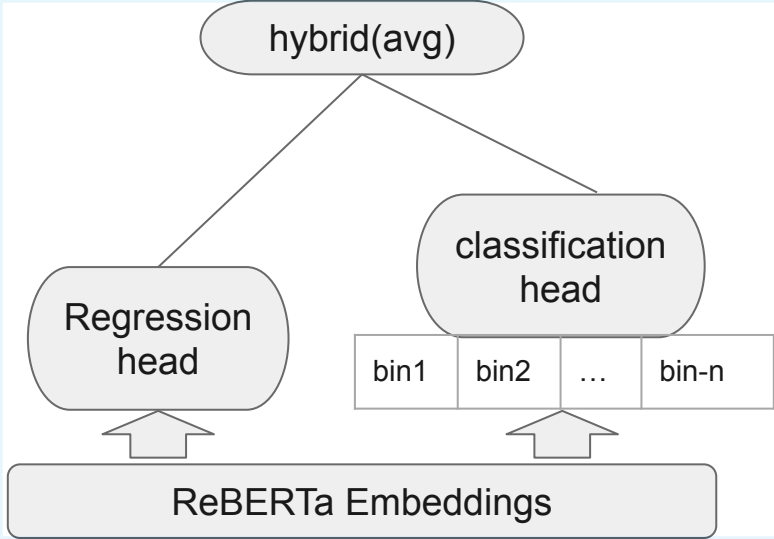

Supplement: SupplementaryMaterial [file Hybrid_Roberta_cropped.pdf › latex/figs/Hybrid_Roberta_cropped.pdf]
